# Supplementary material for: CD147 regulates cancer migration via direct interaction with Annexin A2 and DOCK3-β-catenin-WAVE2 signaling
Source: PubMed Central journal article supplement (PMC4868709; doi:10.18632/oncotarget.6723), 2015-12-22
Supplement: oncotarget-07-5613-s001.pdf [file oncotarget-07-5613-s001.pdf]

## **CD147 regulates cancer migration *via* direct interaction with Annexin A2 and DOCK3- $\beta$ -catenin-WAVE2 signaling**

### **Supplementary Material**

**ESM\_1** Quantification of p-Annexin A2 normalized to levels of CD147 and p-Src expression. Data represent average  $\pm$  SD; \*\*\* $p < 0.001$ , \*\* $p < 0.01$ , ns  $p > 0.05$  by ANOVA. These analyses correspond to the image shown in Fig. 2e

**ESM\_2-3** DOCK3 suppresses lamellipodium dynamics. Movie ESM\_2 shows that lamellipodium dynamics was enhanced in cells transfected with siDOCK3. Cells transfected with siCtrl were used as control (ESM\_3). These movies correspond to the images shown in Fig. 4i

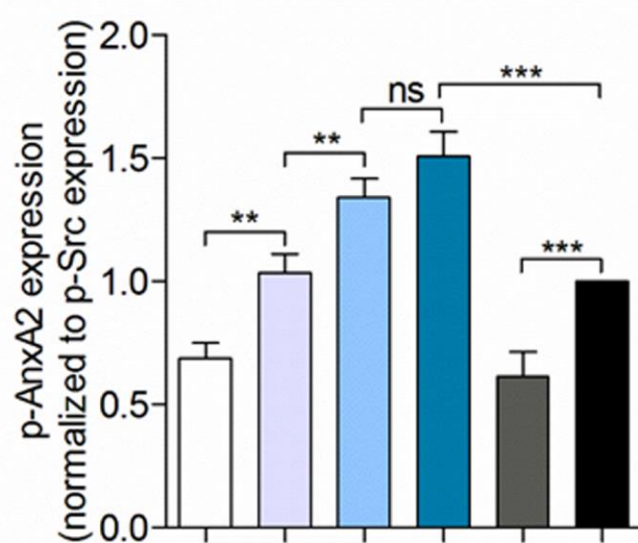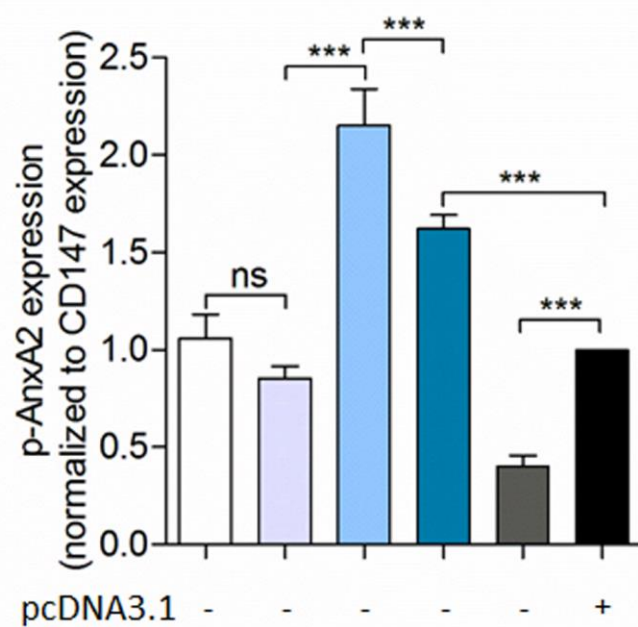

|                   |   |   |   |   |   |   |
|-------------------|---|---|---|---|---|---|
| pcDNA3.1          | - | - | - | - | - | + |
| CD147-pcDNA3.1    | + | + | - | - | + | - |
| Src-pcDNA3.1      | - | + | - | + | - | - |
| SrcY570F-pcDNA3.1 | + | - | + | - | - | - |
